# Supplementary material
Source: MDPI journal article supplement (https://www.mdpi.com/2075-4701/13/7/1280)
Supplement: s1 [file s1]

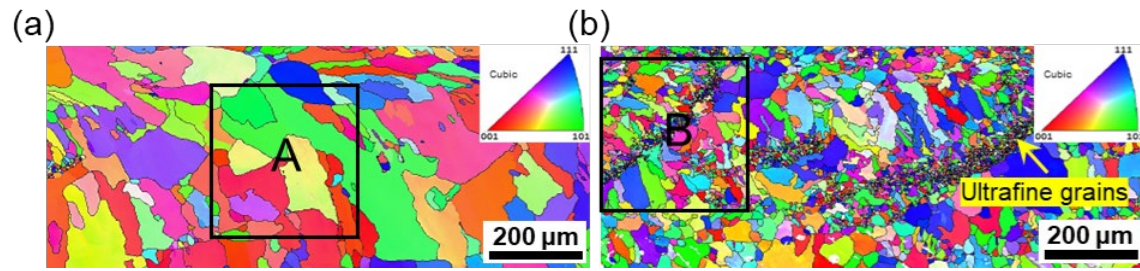

Figure. S1. Overall IPF maps of (a) the TiNbZr layer and (b) the TiTaZr layer. Region A and B are the areas analyzed in the main article.

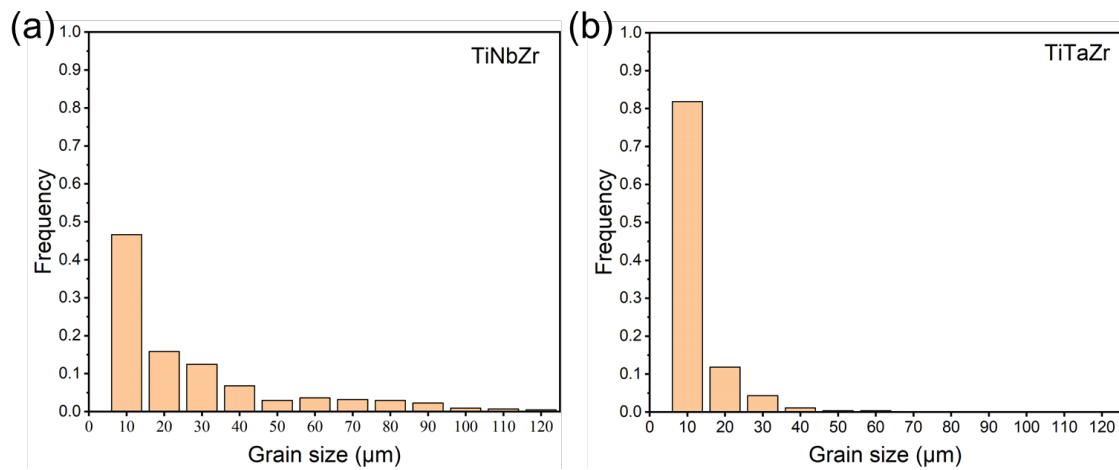

Figure. S2. Grain size distribution histograms of (a) the TiNbZr layer and (b) the TiTaZr layer.
